# Supplementary material for: Collaborative Penalized Least Squares for Background Correction of Multiple Raman Spectra
Source: J Anal Methods Chem. 2018 Aug 29;2018:9031356. doi: 10.1155/2018/9031356 (PMC6136554; doi:10.1155/2018/9031356)
Supplement: Supplementary Materials — The source code for the proposed methods in this study can be accessed at http://www.cis.umac.mo/cybernetics/backRemoveCode.zip. Please download and upzip the file and check the readme.pdf for more information. [file 9031356.f1.zip]

Archive with 11 entries (11 files):
- 9031356.f1/airPLS.m
- 9031356.f1/AS_air.m
- 9031356.f1/AS_MPLS.m
- 9031356.f1/CW_air.m
- 9031356.f1/CW_MPLS.m
- 9031356.f1/Morphology.m
- 9031356.f1/MPLS.m
- 9031356.f1/Readme.pdf
- 9031356.f1/screen2png.m
- 9031356.f1/simulated_compare.m
- 9031356.f1/WhittakerSmooth.m
