# Supplementary material for: Collaborative Penalized Least Squares for Background Correction of Multiple Raman Spectra
Source: J Anal Methods Chem. 2018 Aug 29;2018:9031356. doi: 10.1155/2018/9031356 (PMC6136554; doi:10.1155/2018/9031356)
Supplement: Supplementary Materials — The source code for the proposed methods in this study can be accessed at http://www.cis.umac.mo/cybernetics/backRemoveCode.zip. Please download and upzip the file and check the readme.pdf for more information. [file 9031356.f1.zip › 9031356.f1/Morphology.m]

function Xbg=Morphology(X,windowWeight)
% morphology function in mpls
% used to get the rough background

if nargin ==1
    windowWeight=50;
end
Nx=length(X);
if windowWeight >=Nx/2-1
    windowWeight=floor(Nx/2-1);
end

Xerosion=zeros(1,Nx);
Xdilation=zeros(1,Nx);
i=1;

for j=1:windowWeight
    Xerosion(i,j)=min(X(i,1:j+windowWeight));
end
for j=windowWeight+1:(Nx-windowWeight)
    Xerosion(i,j)=min(X(i,j-windowWeight:j+windowWeight));
end
for j=(Nx-windowWeight+1):Nx
    Xerosion(i,j)=min(X(i,j-windowWeight:Nx));
end

for j=1:windowWeight
    Xdilation(i,j)=max(Xerosion(i,1:j+windowWeight));
end
for j=windowWeight+1:(Nx-windowWeight)
    Xdilation(i,j)=max(Xerosion(i,j-windowWeight:j+windowWeight));
end
for j=(Nx-windowWeight+1):Nx
    Xdilation(i,j)=max(Xerosion(i,j-windowWeight:Nx));
end
 Xbg=Xdilation';
 for j=1:windowWeight
    Xdilation(i,j)=max(X(i,1:j+windowWeight));
end
for j=windowWeight+1:(Nx-windowWeight)
    Xdilation(i,j)=max(X(i,j-windowWeight:j+windowWeight));
end
for j=(Nx-windowWeight+1):Nx
    Xdilation(i,j)=max(X(i,j-windowWeight:Nx));
end
Xbg(end-3:end)=X(end-3:end);
end
