# Supplementary material for: Collaborative Penalized Least Squares for Background Correction of Multiple Raman Spectra
Source: J Anal Methods Chem. 2018 Aug 29;2018:9031356. doi: 10.1155/2018/9031356 (PMC6136554; doi:10.1155/2018/9031356)
Supplement: Supplementary Materials — The source code for the proposed methods in this study can be accessed at http://www.cis.umac.mo/cybernetics/backRemoveCode.zip. Please download and upzip the file and check the readme.pdf for more information. [file 9031356.f1.zip › 9031356.f1/screen2png.m]

function screen2png(filename)

%SCREEN2JPEG Generate a JPEG file of the current figure with

%   dimensions consistent with the figure's screen dimensions.

%

%   SCREEN2JPEG('filename') saves the current figure to the

%   JPEG file "filename".

%

%    Sean P. McCarthy

%    Copyright (c) 1984-98 by MathWorks, Inc. All Rights Reserved

if nargin < 1

     error('Not enough input arguments!')

end

oldscreenunits = get(gcf,'Units');

oldpaperunits = get(gcf,'PaperUnits');

oldpaperpos = get(gcf,'PaperPosition');

set(gcf,'Units','pixels');

scrpos = get(gcf,'Position');

newpos = scrpos/100;

set(gcf,'PaperUnits','inches','PaperPosition',newpos)

print('-dpng', filename, '-r100');

drawnow

set(gcf,'Units',oldscreenunits,'PaperUnits',oldpaperunits,'PaperPosition',oldpaperpos)
