# Supplementary material for: Collaborative Penalized Least Squares for Background Correction of Multiple Raman Spectra
Source: J Anal Methods Chem. 2018 Aug 29;2018:9031356. doi: 10.1155/2018/9031356 (PMC6136554; doi:10.1155/2018/9031356)
Supplement: Supplementary Materials — The source code for the proposed methods in this study can be accessed at http://www.cis.umac.mo/cybernetics/backRemoveCode.zip. Please download and upzip the file and check the readme.pdf for more information. [file 9031356.f1.zip › 9031356.f1/WhittakerSmooth.m]

function z = WhittakerSmooth(y,  w, lambda, order)
% Weighted smoothing with a finite difference penalty
% y:      signal to be smoothed
% lambda: smoothing parameter 
% w:      weights (use one for missing values)
% order:      order of differences in penalty (generally 2)
% Paul Eilers, 2002
      if nargin < 4
          order=2;
      end
m = length(y);
W = spdiags(w, 0, m, m);
D = diff(speye(m), order);
C = chol(W+lambda * D' * D);
z = C \ (C' \ (w .* y));
end
